# Supplementary material
Source: MDPI journal article supplement (https://www.mdpi.com/2409-515X/5/1/13)
Supplement: s1 [file s1]

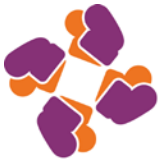

## NewSTEPS Pre-Site Visit Tool

1. Indicate your affiliation with the Newborn Screening (NBS) Program (check all that apply)

|  |                                   |
|--|-----------------------------------|
|  | <b>Lab</b>                        |
|  | <b>Follow-up</b>                  |
|  | <b>Other</b><br>(specify: _____ ) |

2. Self-evaluate how well your state is managing and executing the various components of your NBS program.

|                                     | Very Well | Well | Average | Poor | Very Poor | N/A | Comments |
|-------------------------------------|-----------|------|---------|------|-----------|-----|----------|
| <b>State Legislation and Policy</b> |           |      |         |      |           |     |          |
| <b>Ethics</b>                       |           |      |         |      |           |     |          |
| <b>Funding Models</b>               |           |      |         |      |           |     |          |
| <b>Organizational Structure</b>     |           |      |         |      |           |     |          |
| <b>Laboratory System</b>            |           |      |         |      |           |     |          |
| <b>Emergency Preparedness</b>       |           |      |         |      |           |     |          |
| <b>Short-Term Follow-Up</b>         |           |      |         |      |           |     |          |
| <b>Birth Facilities</b>             |           |      |         |      |           |     |          |
| <b>Point-of-Care Testing</b>        |           |      |         |      |           |     |          |
| <b>Education</b>                    |           |      |         |      |           |     |          |
| <b>Long-Term Follow-Up System</b>   |           |      |         |      |           |     |          |
| <b>Information Technology</b>       |           |      |         |      |           |     |          |
| <b>Evaluation</b>                   |           |      |         |      |           |     |          |



**3. What would you characterize as the three most significant challenges within your NBS Program? Please provide as much information as you can so we can prepare for the visit.**

**4. How well do the different parts of your NBS systems communicate?**

|                                      | Very Well | Well | Average | Poor | Very Poor |
|--------------------------------------|-----------|------|---------|------|-----------|
| <b>Hospital(s) and the Lab</b>       |           |      |         |      |           |
| <b>Lab and Follow-Up</b>             |           |      |         |      |           |
| <b>Follow-Up and the Hospital(s)</b> |           |      |         |      |           |
| <b>Follow up and Specialist(s)</b>   |           |      |         |      |           |

**a. How well is your NBS laboratory and follow up program integrated? (place a check next to the description that best fits)**

|                          |                                                                     |
|--------------------------|---------------------------------------------------------------------|
| <input type="checkbox"/> | <b>They are completely integrated</b>                               |
| <input type="checkbox"/> | <b>They work well together but there is room for improvement</b>    |
| <input type="checkbox"/> | <b>They are somewhat integrated but do miss things occasionally</b> |
| <input type="checkbox"/> | <b>They are not well integrated and often things get missed</b>     |
| <input type="checkbox"/> | <b>They are not at all integrated</b>                               |



**NewSTEPS**

A Program of the Association of Public Health Laboratories™

5. **What are your most significant accomplishments in the last 2-3 years??**
  
6. **What would you like to get out of a site visit? What are your needs?**
  
  
  
  
  
  
  
  
  
  
7. **Are there any specific questions or issues that you would like the site visit team to focus on and address? Please prioritize these for the team and identify specific questions that need to be addressed. Please note: the answers below will help us to customize our visit to your site, but we will not limit ourselves to only these components during the comprehensive visit.**

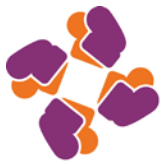

**8. When was your laboratory's last Clinical Laboratory Improvement Amendments (CLIA)/ College of American Pathologists (CAP) inspection?**

**9. We are interested in obtaining the following materials if you have them readily available prior to site visit as well as anything else you think may be of value to the team.**

- NBS Collection Form
- Quality Assurance Plan
- Organizational chart for NBS program
- Provider educational materials—Practitioner's Manuals, fact sheets, websites, etc.
- Parent educational manuals –parent brochures in particular
- Laboratory and Follow-up algorithms
- Examples of Lab Reports (normal and abnormal for each screening category)
- Consent/dissent policy for NBS
- Consent/dissent policy for residual Dried Blood Spots (DBS)
- Release of Information Policy
- Laws/statutes
- List of local hospitals or number of birthing hospitals with annual birth rate
- Annual number of births for the state
- List of specialists
- Website(s)
